# Supplementary material
Source: publisher site journal article supplement (https://www.degruyterbrill.com/publication/dbid/bhde/downloadAsset/BHDE_BHDE%20Eckert%20-%20Emigration%20und%20Exil--de.pdf)
Supplement: Supplementary file 1 [file BHDE_BHDE%20Eckert%20-%20Emigration%20und%20Exil--de.pdf]

Brita Eckert

## Emigration und Exil

Im Rahmen der erzwungenen Emigrationen des 20. Jahrhunderts nimmt sich die deutschsprachige Emigration aus dem Machtbereich der NS-Diktatur – aus Deutschland, sterreich und den deutschsprachigen Teilen der Tschechoslowakei – rein zahlenmäßig relativ klein aus: mit rund 500 000 Personen umfasst sie etwa ein Zehntel der europäischen Fluchtbewegungen zwischen den beiden Weltkriegen.<sup>1</sup> Für die Geschichte und das Selbstverständnis Deutschlands kommt der Emigration zur Zeit der NS-Herrschaft jedoch besondere Bedeutung zu. Sie markiert einerseits das Ende des deutsch-jüdischen Zusammenlebens und hat, als Exodus fast der gesamten geistigen Elite, den Verlust der meisten führenden Vertreter der deutschsprachigen Literatur, der Künste und Wissenschaften zur Folge. Andererseits ermöglichte die Emigration bzw. die Flucht Tausender Regimegegner die Entwicklung politischer Ideen im Exil und Praxiserfahrungen, die nach Kriegsende in die politische Neugestaltung Deutschlands eingebracht werden konnten.

Die zeitgeschichtliche Forschung unterscheidet zwei bzw. drei Hauptgruppen von Emigranten, die sich in vielfacher Hinsicht überschneiden können. Die gemeinsame Ursache ihrer Emigration liegt „im totalitären und terroristischen Charakter der NSDAP begründet.“<sup>2</sup> Ausgehend von den Anlässen der Emigration bzw. der Flucht der antijüdischen Politik der Nationalsozialisten und der Verfolgung der politischen Gegner kennt das „Biographische Handbuch der deutschsprachigen Emigration nach 1933“ jüdische Emigration und politisches Exil. Diese Typologie ist neben der NS-Politik auch am Selbstverständnis der Emigranten orientiert, einer als endgültig verstandenen Auswanderung mit dem Willen zur Akkulturation im Aufnahmeland einerseits oder einer fortdauernden Identifizierung mit dem Herkunftsland und dem Wunsch nach Rückkehr nach dem Sturz des NS-Regimes andererseits. Das „Handbuch der deutschsprachigen Emigration“ (1998) vertritt eine dreifach gegliederte Typologie, die sich gleichfalls an den Fluchtwängen orientiert, aber neben der jüdischen Emigration ausgehend von den Tätigkeiten und Aktivitäten der Emigranten die intellektuelle, literarische und künstlerische Emigration von der politischen Emigration abgrenzt und nur solche Emigranten dem „politischen Exil“ zurechnet, „die im Rahmen von Parteien, Gewerkschaften, politischen oder weltanschaulichen Organisationen [...] die aktive Auseinandersetzung mit dem Nationalsozialismus vom Ausland her fortgesetzt haben.“<sup>3</sup> Von den Anlässen zur Flucht ausgehend, ist ein Großteil der literarischen und künstlerischen Emigration dem politischen Exil, die Wissenschaftsemigration eher der jüdischen Emigration zuzuordnen.

---

1 Werner Röder u. Herbert A. Strauss: Einleitung. In: Biographisches Handbuch der deutschsprachigen Emigration nach 1933 = International biographical dictionary of Central European emigrés 1933-1945. Hrsg. vom Institut für Zeitgeschichte, München, u. von der Research Foundation for Jewish Immigration, New York, unter der Gesamtleitung von Werner Röder u. Herbert A. Strauss. Bd.1-3. – München u. a.: Saur, 1980-1983, Bd. 1, 1980, S. [XIII]-LVIII, S. XIII – Zitiert als: Werner Röder (1980); Herbert A. Strauss (1980)

2 Ebd., S. XXXIII.

3 Werner Röser (1998), S. 17

## Die jüdische Emigration

Nach Herbert A. Strauss spiegelt die Statistik der jüdischen Emigration aus Deutschland mit insgesamt 278 500 Personen „bis zu einem gewissen Grad die Entwicklung der antijüdischen Maßnahmen in NS-Deutschland wider“;<sup>4</sup> diese Maßnahmen lassen sich nach Strauss in etwa fünf Phasen zusammenfassen, wobei eine Phase offenen Terrors in den ersten Monaten nach der nationalsozialistischen Machtübernahme mit dem Boykott jüdischer Geschäfte, Rechtsanwälte, Ärzte usw. und der darauf folgenden Ausschaltung aus dem öffentlichen Leben durch Berufsverbote von einer Phase „schleichender Verfolgung in der Zeit von Sommer 1933 bis Frühjahr 1935 abgelöst wurde. Die dritte Verfolgungsphase, im Frühjahr 1935 erneut mit Terror beginnend, endete am 12. September 1935 mit den „Nürnberger Gesetzen“. Es folgte eine Phase der „schleichenden Verfolgung“ von 1936 bis Herbst 1937; sie wurde wiederum von einer Verschärfung der antijüdischen Maßnahmen abgelöst, die mit den Kriegsvorbereitungen in Verbindung stand und in dem von Goebbels und Hitler initiierten Novemberpogrom vom 9. auf den 10. November 1938, verharmlosend „Reichskristallnacht genannt, endete. Während in den ersten Monaten des Jahres 1933 37 000 Personen emigrierten, darunter vor allem politisch exponierte oder persönlich gefährdete Juden, gehen in den kommenden Jahren die Auswanderungszahlen zurück (1934: 23 000, 1935: 21 000, 1936: 25 000, 1937: 23 000 Personen); sie steigen nach dem Novemberpogrom 1938 und der unmittelbar folgenden Inhaftierung von rund 30 000 jüdischen Männern in Konzentrationslagern, wodurch bewusst Auswanderungsdruck ausgeübt werden sollte, wieder an (1938: 40 000 Personen); 1939 erreichen sie mit 78 000 Personen ihren Höhepunkt. Nach Kriegsbeginn war nur noch eine beschränkte Auswanderung in das neutrale Ausland oder nach Übersee möglich: 1940 und 1941 konnten noch 23 000 Juden aus Deutschland entkommen. Beratung und Unterstützung leisteten vor allem der 1904 gegründete „Hilfsverein der deutschen Juden“ für die Auswanderung in europäische Länder und nach Übersee sowie das Palästina-Amt in Berlin als Dienststelle der „Jewish Agency for Palestine für die Einwanderung nach Palästina“.

Am 23. Oktober 1941 verbot eine Verordnung Himmlers „die Auswanderung von Juden mit sofortiger Wirkung“; danach wurde die Emigration von den Deportationen in die Vernichtungslager abgelöst. Kurz nach dem Emigrationsverbot vom Oktober 1941 wurden mit Verordnung vom 25. November 1941 alle jüdischen Flüchtlinge aus Deutschland, schätzungsweise 250 000 bis 280 000 Menschen, pauschal ausgebürgert und ihres Vermögens beraubt. Von 1942 bis zum Kriegsende gelang noch 8 500 Menschen die Emigration bzw. Flucht aus Deutschland. In Österreich erreichte eine nach der Annexion unter Adolf Eichmann im August 1938 in Wien eingerichtete Zentralstelle für jüdische Auswanderung mit brutalem Zwang und Terror, dass bis zum Kriegsbeginn etwa zwei Drittel der 190 000 österreichischen Juden mehr geflohen als emigriert waren. Die deutschsprachige jüdische Emigration aus der Tschechoslowakei dürfte bei mehr als 4 000 Personen gelegen haben, bei einer Gesamtzahl der jüdischen Emigration aus den böhmischen Ländern und der Slowakei von 33 000 Menschen.

---

4 Herbert A. Strauss (1980), S. XIX

## Die politische und die kulturelle Emigration

Auch die politische Emigration erfolgte in Wellen. Im Unterschied zur jüdischen Emigration emigrierte bzw. floh ein großer Teil der Regimegegner, von denen viele zusätzlich von der antijüdischen Politik des Nationalsozialismus betroffen waren, bereits im Jahre 1933. Anlass für die erste große und überstürzte Fluchtwelle unmittelbar nach dem Brand des Reichstagsgebäudes am 27. Februar 1933 war die akute physische Gefährdung sowohl der exponierten Gegner des Nationalsozialismus zur Zeit der Weimarer Republik Politiker, Publizisten und Vertreter des kulturellen Lebens als auch zahlreicher kommunistischer, sozialdemokratischer und gewerkschaftlicher Funktionäre auf lokaler Ebene. Die dem Reichstagsbrand unmittelbar folgende „Verordnung des Reichspräsidenten zum Schutz von Volk und Staat“ vom 28. Februar 1933 bot die pseudolegale Grundlage für Razzien unter den Funktionären und Mitgliedern der KPD, die nach den Reichstagswahlen vom 5. März und der Machtübernahme in den Ländern auf weitere Gegnergruppen SPD- und Gewerkschaftsfunktionäre, Reichsbannermitglieder u. a. ausgeweitet wurde. Die Auflösung der Gewerkschaften am 2. Mai 1933, die Bücherverbrennung am 10. Mai 1933, das Verbot der SPD am 22. Juni und die Besiegelung der nationalsozialistischen Alleinherrschaft durch das „Gesetz gegen die Neubildung von Parteien“ am 14. Juli bildeten weitere Stationen der Ausschaltung der politischen und kulturellen Gegner. Das gleichfalls am 14. Juli 1933 erlassene „Gesetz über den Widerruf von Einbürgerungen und die Aberkennung der Staatsangehörigkeit“ wurde zunächst gegen prominente politische Gegner, von 1937 an zunehmend auch gegen jüdische Emigranten angewandt. Insgesamt 39 006 Personen wurden zwischen dem 25. August 1933 und dem 7. April 1945 namentlich ausgebürgert und ihres Vermögens beraubt.<sup>5</sup>

Die zweite Phase der politischen Emigration setzte im Sommer 1933 mit der diesmal besser organisierten Emigration zunehmend gefährdeter Spitzenfunktionäre ein. Sie sollten vor allem die seit dem Frühjahr im angrenzenden Ausland aufgebauten Partei-Vertretungen und -Stützpunkte zu Auslandsleitungen bzw. Parteivorständen im Exil ausbauen, deren Aufgabe auch in der Anleitung, Unterstützung und publizistischen Vertretung des inneren Widerstands bestand. über ein Netz von Grenzstellen belieferten vor allem die Exilvertretungen der alten Arbeiterbewegung die illegalen Gruppen im Reich mit Kampfschriften und nahmen durch Kuriere und Instrukteure Verbindungen zu Widerstandskreisen auf Aktivitäten, deren Höhepunkt wegen der zunehmenden Erfolge der Gestapo bereits 1936 überschritten war.<sup>6</sup>

<sup>5</sup> Vgl. Die Ausbürgerung deutscher Staatsangehöriger 1933-45 nach den im Reichsanzeiger veröffentlichten Listen = Expatriation lists as published in the „Reichsanzeiger“ 1933-45. Hrsg. von Michael Hepp. Eingel. von Hans Georg Lehmann u. Michael Hepp. Bd. 1-3. – München u. a.: Saur, 1985-1988

<sup>6</sup> Besondere Bedeutung kam hierbei den Tarnschriften zu, Publikationen mit unverfänglichem Umschlag, Titelblatt und zum Teil fingiertem Impressum, aber mit gegen den Nationalsozialismus gerichtetem Inhalt, die im Ausland zur illegalen Verbreitung in Deutschland gedruckt wurden. Mehr als 1 000 Tarnschriften wurden bisher ermittelt. Vgl. hierzu: Heinz Gittig: Bibliographie der Tarnschriften 1933 bis 1945. – München u. a.: Saur, 1996; Tarnschriften 1933-1945. Hrsg. in Zusammenarb. mit der Stiftung Archiv der Parteien und Massenorganisationen der DDR im Bundesarchiv. – München: Saur, 1997 (Mikrofiche-Edition von 1024 Tarnschriften).

Während einer dritten Emigrationsphase, zu der auch eine relativ hohe Zahl von Emigranten aus dem Saargebiet gehörte und die bis in den Krieg hinein dauerte, flüchteten vor allem von Entdeckung bedrohte Mitglieder von Widerstandsgruppen. Aus Österreich flohen nach dem 12. Februar 1934 mehrere Tausend Bedrohte des Ständeregimes Mitglieder der Arbeiterparteien und der Freien Gewerkschaften, zu denen nach der Annexion im März 1938 auch Vertreter des Ständestaates kamen. Nach dem Münchner Abkommen vom 29. September 1938 flohen aus der Tschechoslowakei mehr als 6 000 gefährdete NS-Gegner. Insgesamt haben bis zum Kriegsbeginn annähernd 30 000 Personen den Machtbereich des NS-Regimes aus politischen Gründen verlassen. Die Mehrzahl gehörte den Parteien, Gruppen und Verbänden der Linken an; daneben fanden sich auch Repräsentanten der bürgerlichen Parteien Zentrum, Liberale, Nationalkonservative, linke Nationalisten, bis zu oppositionellen Nationalsozialisten sowie Vertreter der christlichen Kirchen. Unter den politischen Emigranten waren die ehemaligen Reichskanzler Philipp Scheidemann, Joseph Wirth, Heinrich Brüning, 27 ehemalige Mitglieder von Reichs- und Länderregierungen und 267 Reichs- und Landtagsabgeordnete.

Der Umfang der kulturellen und intellektuellen Emigration betrug weit über 10 000 Personen, darunter etwa 2 500 Schriftsteller, Publizisten und Journalisten, 2 000 Wissenschaftler und 6 320 Künstler aus den Bereichen Theater (4 000 Personen), Film (2 000 Personen), Fotografie (200 Personen) und Tanz (120 Personen).

## Die Aufnahmeländer

Fluchtziele der politischen wie auch der meisten kulturellen Emigranten, die „möglichst nahe den Grenzen“ (Bertolt Brecht) leben und wirken wollten, um so viel wie möglich vom Geschehen in Deutschland zu erfahren und vielleicht auch auf es einzuwirken, bildeten bis 1938 die Anrainerstaaten des „Dritten Reiches“ Frankreich, das Saargebiet (bis 1934/35), Belgien, die Niederlande, Dänemark, die Tschechoslowakei, Österreich und die Schweiz. Über Asylpraxis und Lebensbedingungen in zahlreichen Aufnahmeländern liegen gründliche Untersuchungen vor; hier müssen Andeutungen genügen: Die wichtigsten europäischen Exilzentren bis 1938/39 waren Frankreich und die Tschechoslowakei. In Paris, bis 1939 die „Hauptstadt der Emigration“, entstanden Exilverlage, Exilzeitschriften, darunter die Tageszeitung „Pariser Tageblatt“ (ab Juni 1936 „Pariser Tageszeitung“). Paris war bis 1935 Sitz des Parteivorstands der KPD und Aufenthaltsort für die Hälfte der emigrierten deutschen Kommunisten in den 30er Jahren. Die Tschechoslowakei wurde Zentrum der sozialdemokratischen Emigration; in Prag hatte sich im Juni 1933 ihr Parteivorstand niedergelassen, bis er im Frühsommer 1938, vor den deutschen Expansionsbestrebungen, nach Paris übersiedelte; in Karlsbad erschien von Juni 1933 bis Dezember 1937 das Parteiorgan „Vorwärts“ als „Neuer Vorwärts“ (anschließend in Paris bis 12. Mai 1940). Die beiden bedeutendsten literarischen Exilverlage Querido und Allert de Lange hatten in Amsterdam ihren Sitz. Auch in der Schweiz, die sich der deutschen Emigration gegenüber äußerst restriktiv zeigte, wurden, vor allem in den Verlagen Emil Oprechts, zahlreiche Schriften des Exils verlegt; am Zürcher Schauspielhaus entstand aus emigrierten deutschen Theaterleuten eine Bühne höchsten Niveaus. Die Sowjetunion nahm neben führenden kommunistischen

Funktionären nur ihr nahe stehende Intellektuelle und Künstler auf, von denen viele Opfer der Stalinschen Säuberungen und der Moskauer Prozesse wurden. Die Türkei holte gezielt verfolgte Wissenschaftler ins Land, um ihr Universitätswesen zu reformieren.

Die jüdische Emigration konzentrierte sich in den ersten drei Jahren des NS-Regimes, ähnlich wie das politische Exil, in Kontinentaleuropa. Hauptaufnahmeländer der jüdischen Emigration waren jedoch das britische Mandatsgebiet Palästina und, verstärkt nach den arabischen Unruhen von 1936 an, die Vereinigten Staaten von Amerika, die mit 132 000 Einwanderern zwischen 1933 und 1945 an der Spitze aller Aufnahmeländer standen. Nach dem Novemberpogrom 1938 und der Annexion der Rest-Tschechoslowakei änderte auch Großbritannien, das sich das Scheitern seiner Appeasement-Politik eingestehen musste, seine restriktive Haltung und nahm bis Kriegsbeginn rund 75 000 Flüchtlinge aus Deutschland, Österreich und der Tschechoslowakei auf. Bedeutung als Asylland erhielt jetzt auch Schweden. Als letzter Ausweg blieb etwa 13 000 jüdischen Flüchtlingen nur die Internationale Niederlassung von Shanghai, die als einziges Gebiet der Welt die Einreise ohne Visum gestattete.

## Politische Publizistik und Literatur im Exil

Nach Heinrich Mann sollte die Emigration „Stimme ihres stumm gewordenen Volkes [...] vor aller Welt sein.“<sup>7</sup> In ihrem Selbstverständnis als Repräsentanten eines anderen, besseren Deutschland sah die politische Emigration wie auch die politisch engagierte kulturelle Emigration eine ihrer wichtigsten Aufgaben in der Aufklärung des Auslands über die Verbrechen des NS-Regimes. Als Mittel hierzu diente besonders die Exilpresse. Neben Tausenden von Büchern und Broschüren sind im Exil mehr als 450 Zeitschriften, Zeitungen und Rundbriefe von unterschiedlichem Umfang und unterschiedlicher Erscheinungsdauer erschienen, wobei die österreichische Exilpresse nicht mitgezählt wurde. Sie repräsentieren das gesamte Spektrum des Exils, das seinerseits alle Schichten und Gruppen der Republik von Weimar, wenn auch in unterschiedlichen Proportionen, widerspiegelte. Die Exilpresse blieb fast einziges Forum, um das sich die Versprengten sammelten. Vor allem hier wurde die Frage nach den Ursachen des NS-Regimes gestellt und die Zustände in Deutschland beobachtet und analysiert. Neue Programme und Taktiken wurden diskutiert und gegen Kriegsende die Neugestaltung des Staates und der Gesellschaft innerhalb einer künftigen Nachkriegsordnung in Europa erörtert. Für die exilierten Schriftsteller etablierte Autoren wie Anfänger - bedeutete Mitarbeit an Exilperiodika Wiedergewinnung von Kommunikation, das Gefühl der Zugehörigkeit, Vorbeugung gegen Sprachverlust. Spätestens mit dem Ausbruch des Zweiten Weltkriegs war die Zeit der großen Exilzeitschriften vorbei. Die an den neuen Exilorten entstandenen Zeitschriften waren meist nur noch Rundbriefe und Informationsblätter für kleine Kreise Gleichgesinnter. Die größte Ausnahme bildete die deutschsprachige jüdische Wochenzeitung „Aufbau / Reconstruction“, die von

---

7 Heinrich Mann und ein junger Deutscher: Der Sinn dieser Emigration. – Paris: Europäischer Merkur, 1934, S. 33.

Dezember 1934 an in New York erschien. Sie hat wesentlich zur Akkulturation beigetragen, ohne die Verbindung zur deutschen Kultur zu leugnen.

Als Stimme des verstummten deutschen Volkes verstand sich auch die Literatur, die unter den erschwerten Bedingungen des Exils entstehen und verlegt werden konnte. Die Exilerfahrung selbst wurde zum Thema, die jüngste deutsche Vergangenheit und vor allem das vom nationalsozialistischen Gegner besetzte und terrorisierte Deutschland, sei es in Augenzeugenberichten, Reportageromanen oder Epochenbilanzen. Auch der historische Roman wurde zum Medium der Auseinandersetzung mit der Gegenwart. Hinzu kommen kamen Werke, die nicht unmittelbar der politischen Auseinandersetzung mit der Zeit entsprungen sind, die aber Maßstäbe setzen und bewahren konnten. Gegenüber formalen Neuerungen in der Literatur wie in anderen Künsten waren die Exilanten hingegen in der Regel zurückhaltend.

## Die Emigranten im Zweiten Weltkrieg

Spätestens mit Beginn des Zweiten Weltkriegs im September 1939 mussten die meisten Emigranten nicht nur die Länder, sondern die Kontinente wechseln. Nach Kriegsbeginn wurden in Frankreich etwa 18 000 bis 20 000 deutschsprachige Emigranten in Internierungslagern festgehalten. 1940 folgten auch Internierungen in Großbritannien und Zwangsverschickungen nach Kanada und Australien. Die Kapitulation Frankreichs im Juni 1940 löste eine neue Fluchtwelle aus in das unbesetzte Gebiet, von dort über die Pyrenäen, Spanien und Portugal nach Übersee. Die USA wurden nun zum begehrtesten Exilland. Künstler und Wissenschaftler, die bereit waren, sich in den amerikanischen Kultur- und Wissenschaftsbetrieb einzufügen, konnten hier z. T. erhebliche berufliche Erfolge verbuchen und darüber hinaus ihren Kunstfächern, wie Architektur und Design, und ihren Wissenschaftsgebieten, wie Kunstgeschichte, Wirtschaftswissenschaften und Psychiatrie, neue Wege weisen.<sup>8</sup> Auch Mexiko und einige südamerikanische Staaten nahmen Hitler-Flüchtlinge aus Europa auf. Schätzungsweise 30 000 jüdische Emigranten in Westeuropa, die nicht weiter fliehen konnten, wurden nach der deutschen Besatzung ihrer Asylländer in die Vernichtungslager im Osten deportiert und dort ermordet.

In ihrem Anspruch, Vertreter eines „anderen Deutschland“ zu sein, wurden die Emigranten zumindest von den Briten und Amerikanern offiziell nicht anerkannt. Versuche, eine Exilregierung in den USA zu schaffen, schlugen fehl. Es blieb nur der Kampf als einzelne gegen Hitler, in der amerikanischen oder britischen Armee, in der Résistance, in der Kriegspropaganda der Alliierten.

---

<sup>8</sup> Vgl. hierzu: Ulrike Wendland: Biographisches Handbuch deutschsprachiger Kunsthistoriker im Exil: Leben u. Werk der unter dem Nationalsozialismus verfolgten u. vertriebenen Wissenschaftler. Bd. 1-2. – München: Saur, 1999; Biographisches Handbuch der deutschsprachigen wirtschaftswissenschaftlichen Emigration nach 1933. Hrsg. von Harald Hagemann u. Claus-Dieter Krohn. Unter Mitarb. von Hans Ulrich Esslinger. Bd. 1-2. – München: Saur, 1999; Uwe Henrik Peters: Psychiatrie im Exil : die Emigration der dynamischen Psychiatrie aus Deutschland 1933-1939. – Düsseldorf: Kupka, 1992.

Als demokratische Patrioten kämpften Emigranten für die Chance, eine neue deutsche Republik innerhalb eines freien Europa zu errichten ein Kampf auf verlorenem Posten angesichts der Pläne zur Aufteilung Deutschlands, die seit der Konferenz von Teheran bekannt wurden.

## Die Rückkehr

Nach dem Zusammenbruch des NS-Regimes schien die politische Kontinuität wieder hergestellt. In beiden deutschen Staaten, vorher in den Besatzungszonen, nahmen ehemalige Exilanten bei einer Rückkehrtrate von nahezu 70 % in das politische Exil – führende Stellungen ein. Dies galt vor allem für die Sowjetische Besatzungszone, wohin sofort nach Kriegsende Walter Ulbricht und Wilhelm Pieck als maßgebende Partei- und Staatsfunktionäre zurückkehrten. – In die Westzonen, die spätere Bundesrepublik Deutschland, kamen vor allem sozialdemokratische Spitzenpolitiker, die die Nachkriegspolitik wesentlich mitbestimmen sollten, an erster Stelle Erich Ollenhauer, Ernst Reuter, Herbert Wehner und Willy Brandt. Das „Biographische Handbuch der deutschsprachigen Emigration nach 1933“ weist nach, dass nach 1945 zeitweise über 50 % der Sitze im Parteivorstand der SPD auf Rückkehrer aus dem Exil entfielen; 28 ehemalige Emigranten haben Ministerposten eingenommen. Zudem haben viele im Ausland Verbliebene durch ihren Einfluss die Integration ihrer Herkunftsländer in die internationale Staatengemeinschaft gefördert. Zahlreiche Rückkehrwillige konnten allerdings erst 1949, mit der Gründung der Bundesrepublik, zurückkehren, da sie als politisch Unbequeme von den Amerikanern und Briten keine Einreisegenehmigung erhalten hatten. Doch bald fanden sich viele schon wieder ausgeschlossen. Der „Kalte Krieg“ und der wirtschaftliche Aufschwung, der neues Selbstbewusstsein verlieh, waren der Selbsterforschung und Selbstkritik nicht zuträglich. Bis in die zweite Hälfte der 60er Jahre hinein wurde Politikern in Wahlkämpfen die Tatsache ihrer Emigration sogar als Makel vorgeworfen.

## Zur Erforschung des Exils

Unter solchen Voraussetzungen war an eine planmäßige wissenschaftliche Erforschung des Exils und seiner Leistungen gleich nach 1945 nicht zu denken. In den 50er und 60er Jahren nahmen sich nur einige Bibliotheken und Archive in der Bundesrepublik Deutschland der Aufgabe an, das Erbe der Emigration zu sammeln, darunter die 1947 neu gegründete Deutsche Bibliothek in Frankfurt am Main, das Institut für Zeitgeschichte in München, das 1955 gegründete Deutsche Literaturarchiv in Marbach, das Bundesarchiv in Koblenz und die Akademie der Künste in Berlin (West).<sup>9</sup> Erst eine Veränderung im politischen und geistigen Klima der Bundes-

---

<sup>9</sup> Vgl. hierzu: Inventar zu den Nachlässen emigrierter deutschsprachiger Wissenschaftler in Archiven und Bibliotheken der Bundesrepublik Deutschland / Die Deutsche Bibliothek. Bearb. im Deutschen Exilarchiv 1933-1945 der Deutschen Bibliothek Frankfurt am Main. Red. Bearb.: Gabriele von Glasenapp u. Barbara Brunn. Wiss. Leitung:

republik, die Mitte der 60er Jahre einsetzte, und die Studentenbewegung von 1968 schufen hier die Voraussetzungen für eine intensivere Beschäftigung mit Emigration und Exil. Ein eigener interdisziplinärer Forschungszweig, die „Exilforschung“, entstand, die von 1969 an wirkungsvoll durch die Deutsche Forschungsgemeinschaft gefördert wurde. In der DDR wurde der Aufschwung der Exilforschung in der Bundesrepublik zum Anlass einer verstärkten Auseinandersetzung mit der im Exil entstandenen antifaschistischen Literatur. Heute ist die Erforschung der deutschsprachigen Emigration 1933 bis 1945 eine internationale Gemeinschaftsaufgabe, an der vor allem die Kulturwissenschaften, Zeitgeschichte und Soziologie auch vieler Aufnahmeländer, vor allem in den USA, Frankreich und Großbritannien, beteiligt sind. In einer 1984 gegründeten Gesellschaft für Exilforschung sind Exilforscher aus aller Welt vertreten. Am gründlichsten aufgearbeitet wurde bisher das politische und literarische Exil. Auch für die jüdische Emigration liegen zahlreiche Forschungsarbeiten vor. Doch noch immer gibt es Gebiete wie die Fotografie, die Musik und die Bildende Kunst und Themen wie die Rückkehr, Fragen der Akkulturation, des Rollenwechsels von Frauen im Exil u. a., die noch intensiver erforscht werden müssten. Immer mehr kommen auch die anderen Emigrationen des 20. Jahrhunderts und der Gegenwart vergleichend ins Blickfeld. Doch wird es eine ständige Aufgabe bleiben, die Erinnerung an die zum Exodus gezwungene geistige Elite wie auch an die vielen unbekannten Emigranten und an den Widerstand aus dem Exil gegen Diktatur und Inhumanität als verpflichtende Tradition unserer Gesellschaft lebendig zu erhalten.

Frankfurt am Main, April 2006

---

Brita Eckert. – München u. a.: Saur, 1993; Quellen zur deutschen politischen Emigration 1933-1945: Inventar von Nachlässen, nichtstaatlichen Akten und Sammlungen in Archiven und Bibliotheken der Bundesrepublik Deutschland. Hrsg. im Auftr. der Herbert und Elsbeth Weichmann-Stiftung von Heinz Boberach. Bearb. von Ingrid Schulze-Bidlingmaier unter Mitw. von Ursula Adam. – München u. a.: Saur, 1994.

## Anmerkung:

Literatur, die bei der Einführung herangezogen, aber meist nicht im einzelnen nachgewiesen wurde

Werner Röder u. Herbert A. Strauss: Einleitung. In: Biographisches Handbuch der deutschsprachigen Emigration nach 1933 = International biographical dictionary of Central European emigrés 1933-1945. Hrsg. vom Institut für Zeitgeschichte, München, u. von der Research Foundation for Jewish Immigration, New York, unter der Gesamtleitung von Werner Röder u. Herbert A. Strauss. Bd.1-3. München u. a.: Saur, 1980-1983, Bd. 1, 1980, S. [XIII]-LVIII. - Zitiert als: Werner Röder (1980); Herbert A. Strauss (1980).

Handbuch der deutschsprachigen Emigration 1933-1945. Hrsg. von Claus-Dieter Krohn, Patrik von zur Mühlen, Gerhard Paul u. Lutz Winckler unter red. Mitarb. von Elisabeth Kohlhaas in Zus.arb. mit der Gesellschaft für Exilforschung. Darmstadt: Wissenschaftliche Buchgesellschaft, 1998.

Darin vor allem:

Wolfgang Benz: Die jüdische Emigration, column 1-10;

Werner Röder: Die politische Emigration, Column 16-30. Cited as: Werner Röder (1998);

Alexander Stephan: Die intellektuelle, literarische und künstlerische Emigration, Column 30-46.

Brita Eckert and Werner Berthold: Belletristik und Publizistik im Exil 1933-1945: eine Einführung. In: Börsenblatt für den Deutschen Buchhandel. Frankfurter Ausgabe. Jg. 46 (1990), Nr. 77 (25.9.). Beilage: Aus dem Antiquariat. 1990, Nr. 9, S. A 365-382.

---

Erstveröffentlichung in:

Deutsche Geschichte im 20. Jh.: Nationalsozialismus, Holocaust, Widerstand und Exil 1933-1945 Online, De Gruyter/K.G. Saur (2006–2022)
